# Supplementary material
Source: Springer Nature journal article supplement (http://www.springermedizin.de/resource/supplementary/13601_2013_360_MOESM2_ESM.pdf/9677874)

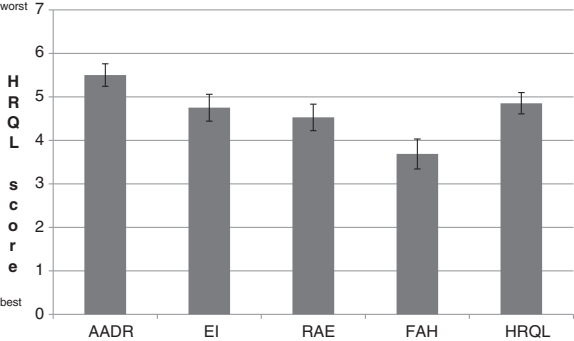

Supplement: MOESM2 [file 9677874]
